# Supplementary material for: In Vitro Evidence of Selective Pro-Apoptotic Action of the Pure Cannabidiol and Cannabidiol-Rich Extract
Source: MDPI journal article supplement (doi:10.3390/molecules28237887), 2023-12-01
Supplement: s1 [file s1]

**Supplementary Table S1.** Primers used in the quality assessment of the reverse transcription.

| Primer  | Sequence                   |
|---------|----------------------------|
| GAPDH-F | 5'-GGGCATGAAGAATGAGAAGT-3' |
| GAPDH-R | 5'-GTCTTCTGGGTGGCAGTGAT-3' |
