# Supplementary material for: In Vitro Evidence of Selective Pro-Apoptotic Action of the Pure Cannabidiol and Cannabidiol-Rich Extract
Source: MDPI journal article supplement (doi:10.3390/molecules28237887), 2023-12-01
Supplement: s1 [file s1]

**Supplementary Figures S1–S12.** Representative images of the cells used in the study after 24 hours of incubation with studied solutions in either standard (left panels) or low-FBS (right panel) medium conditions.

Supplementary Figure S1. MDA-MB-231 cells incubated with CBD solution.

Supplementary Figure S2. MDA-MB-231 cells incubated with extract B solution.

Supplementary Figure S3. MDA-MB-231 cells incubated with extract D solution.

Supplementary Figure S4. PC-3 cells incubated with CBD solution.

Supplementary Figure S5. PC-3 cells incubated with extract B solution.

Supplementary Figure S6. PC-3 cells incubated with extract D solution.

Supplementary Figure S7. PNT2 cells incubated with CBD solution.

Supplementary Figure S8. PNT2 cells incubated with extract B solution.

Supplementary Figure S9. PNT2 cells incubated with extract D solution.

Supplementary Figure S10. MCF-10A cells incubated with CBD solution.

Supplementary Figure S11. MCF-10A cells incubated with extract B solution.

Supplementary Figure S12. MCF-10A cells incubated with extract D solution.
