# Supplementary material for: In Vitro Evidence of Selective Pro-Apoptotic Action of the Pure Cannabidiol and Cannabidiol-Rich Extract
Source: Molecules. 2023 Dec 1;28(23):7887. doi: 10.3390/molecules28237887 (PMC10708261; doi:10.3390/molecules28237887)
Supplement: Supplementary file 1 [file molecules-28-07887-s001.zip]

Archive with 14 entries (14 files):
- Supplementary Figure S1 MDA CBD.pdf
- Supplementary Figure S10 MCF10 CBD.pdf
- Supplementary Figure S11 MCF10 EB.pdf
- Supplementary Figure S12 MCF10 ED.pdf
- Supplementary Figure S2 MDA EB.pdf
- Supplementary Figure S3 MDA ED.pdf
- Supplementary Figure S4 PC3 CBD.pdf
- Supplementary Figure S5 PC3 EB.pdf
- Supplementary Figure S6 PC3 ED.pdf
- Supplementary Figure S7 PNT CBD.pdf
- Supplementary Figure S8 PNT EB.pdf
- Supplementary Figure S9 PNT ED.pdf
- Supplementary Figures captions.pdf
- Supplementary Table S1.pdf
