# Supplementary figures and images for: In Vitro Evidence of Selective Pro-Apoptotic Action of the Pure Cannabidiol and Cannabidiol-Rich Extract
Source: MDPI journal article supplement (doi:10.3390/molecules28237887), 2023-12-01

## 10% FBS

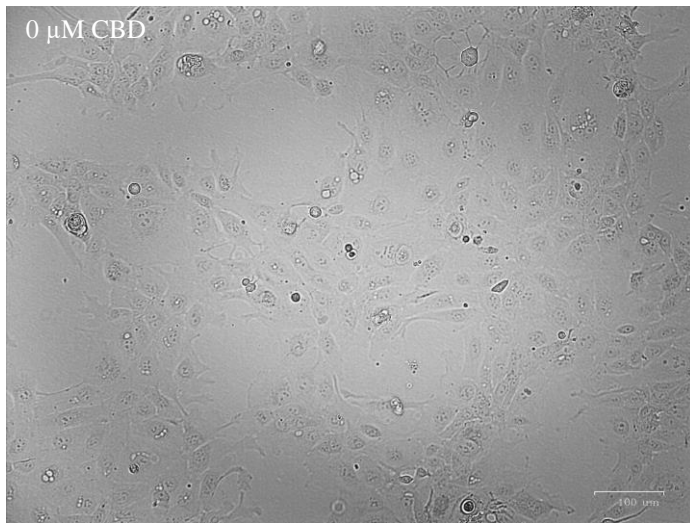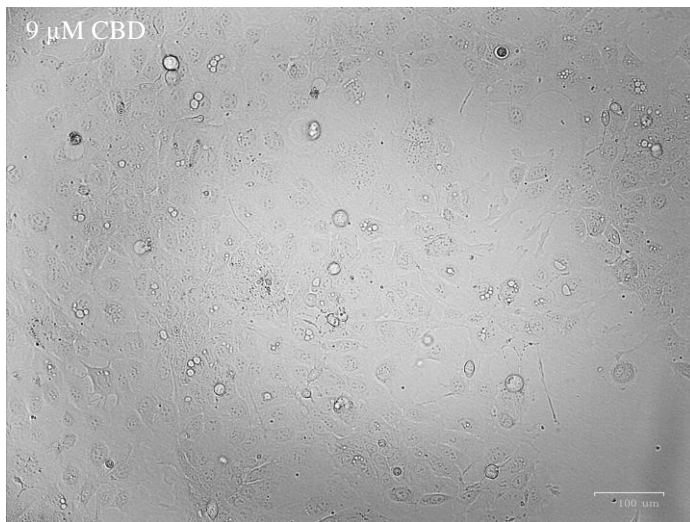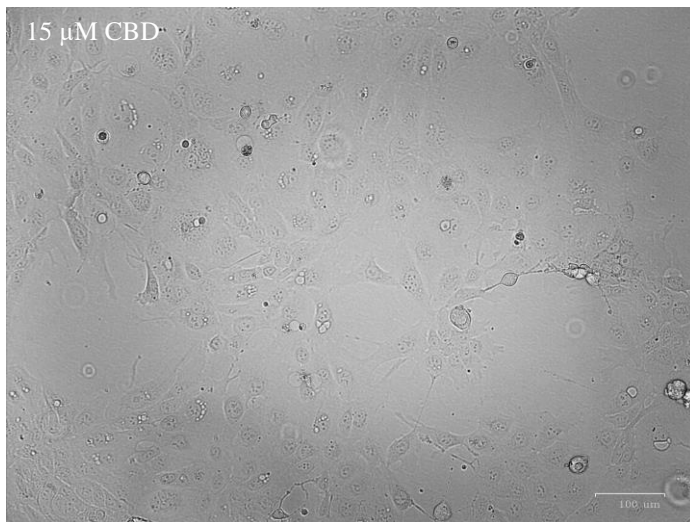

## 0.5% FBS

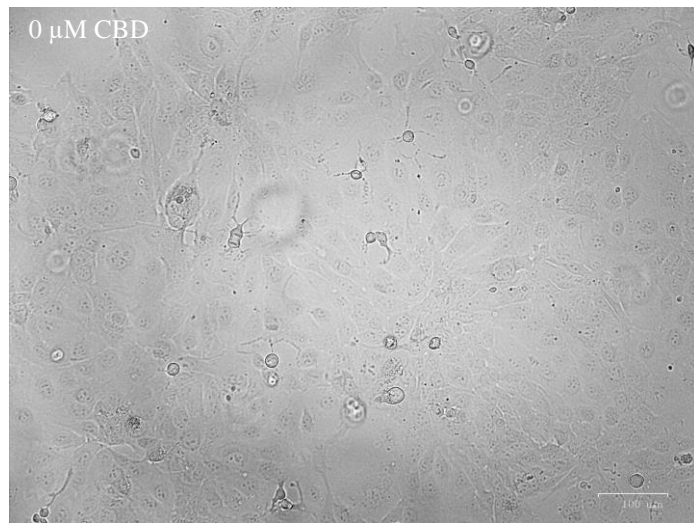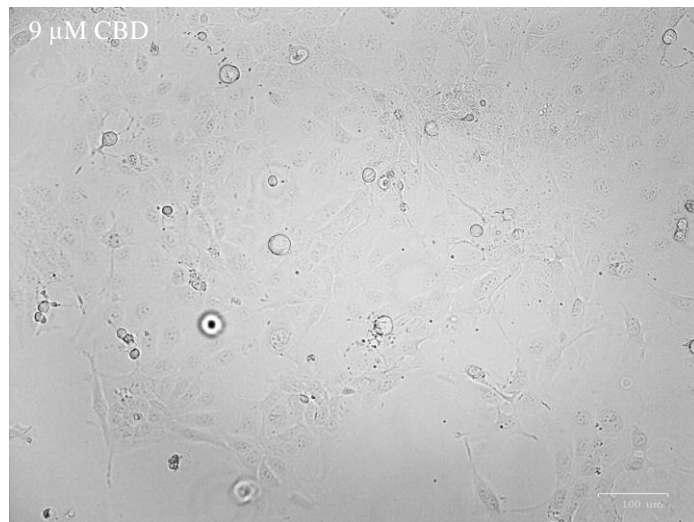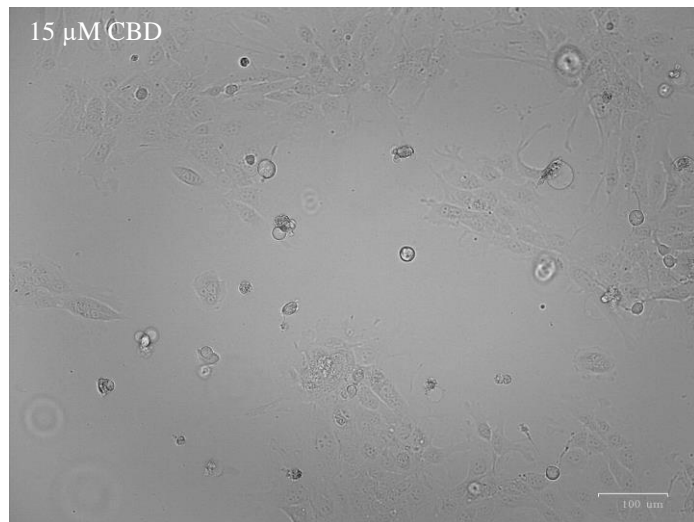

Supplement: s1 [file s1]

**10% FBS**

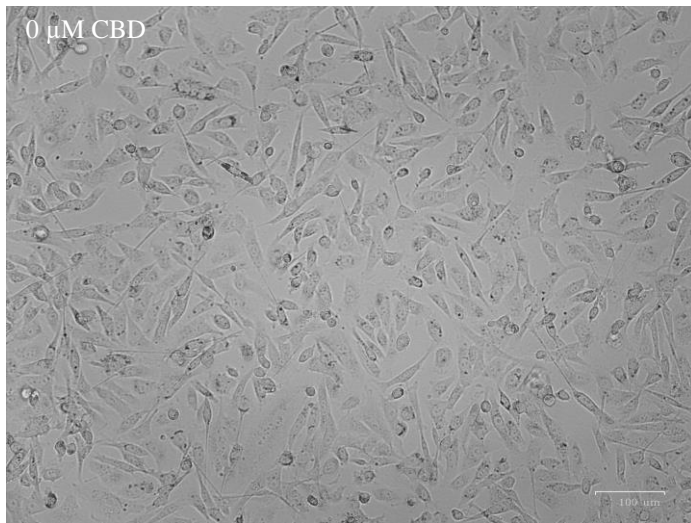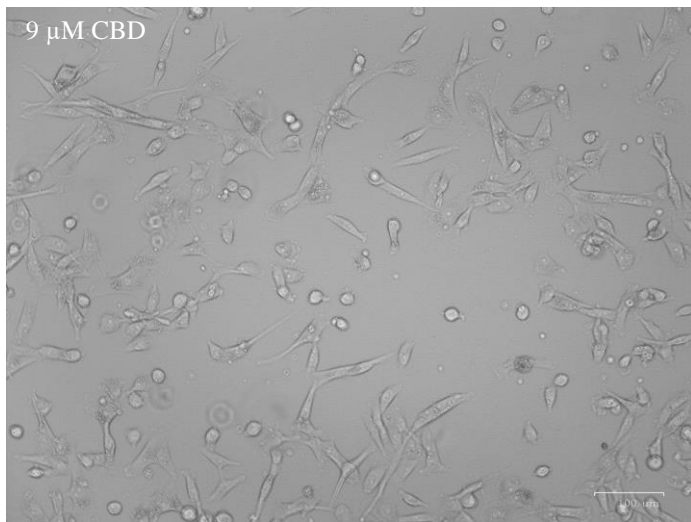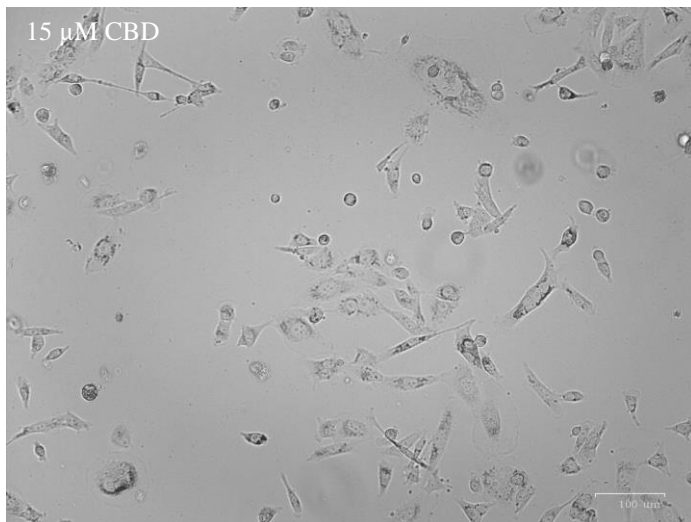

**0.5% FBS**

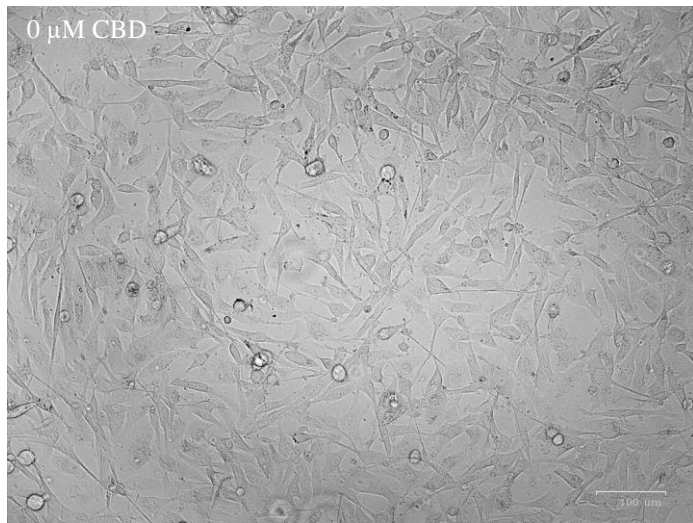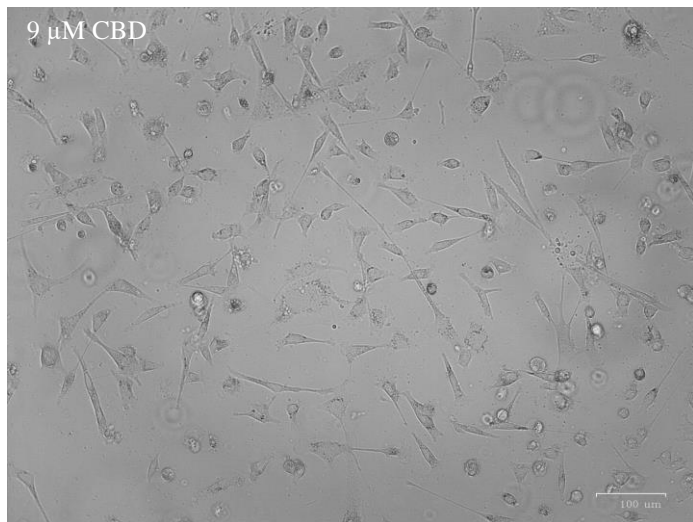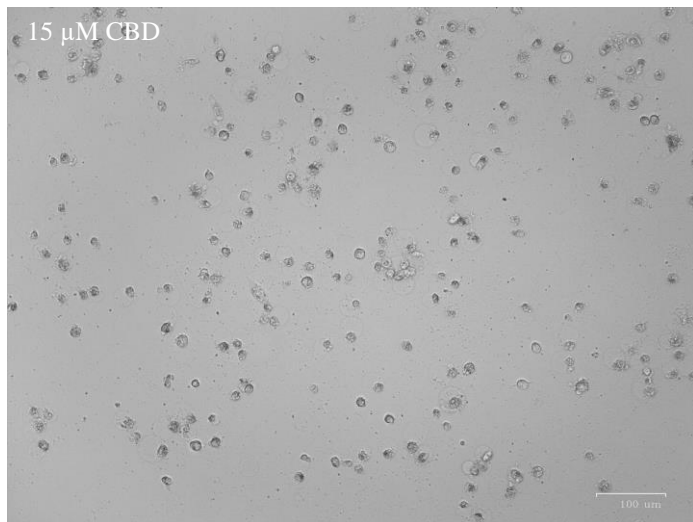

Supplement: s1 [file s1]

## 10% FBS

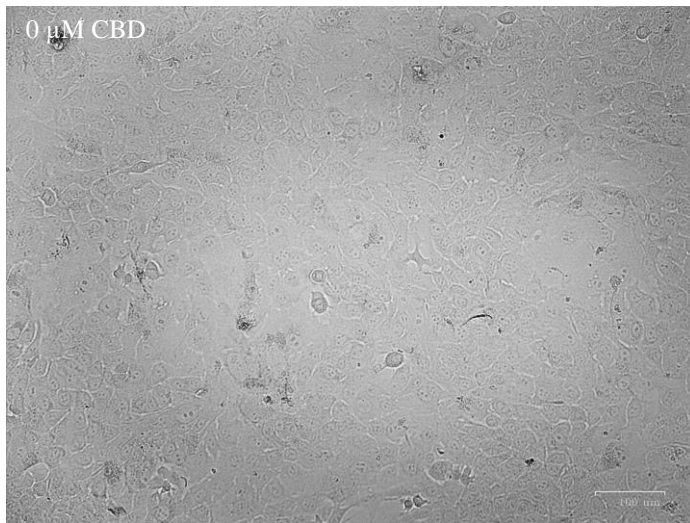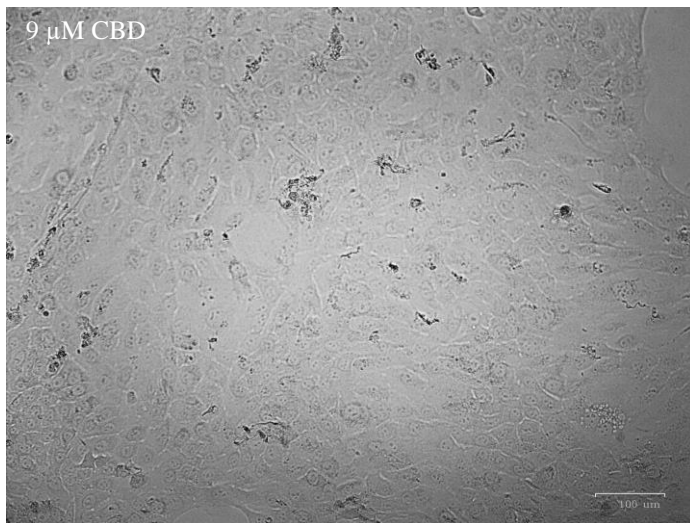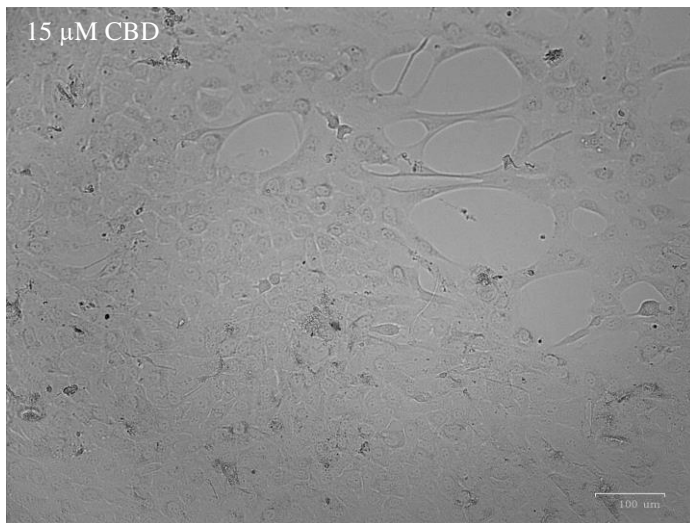

## 0.5% FBS

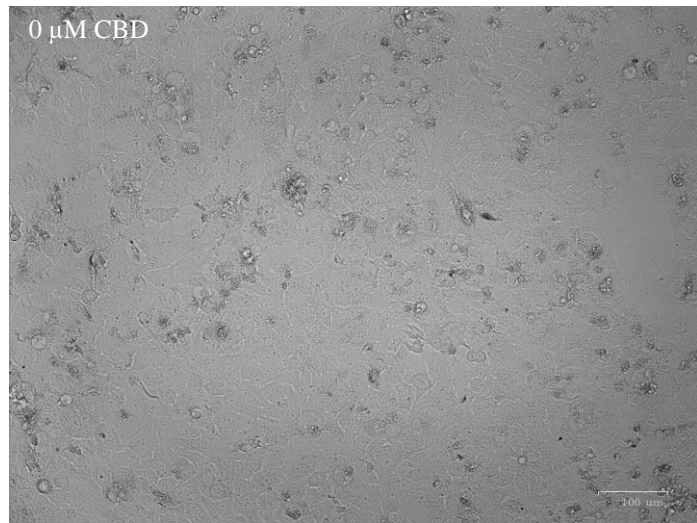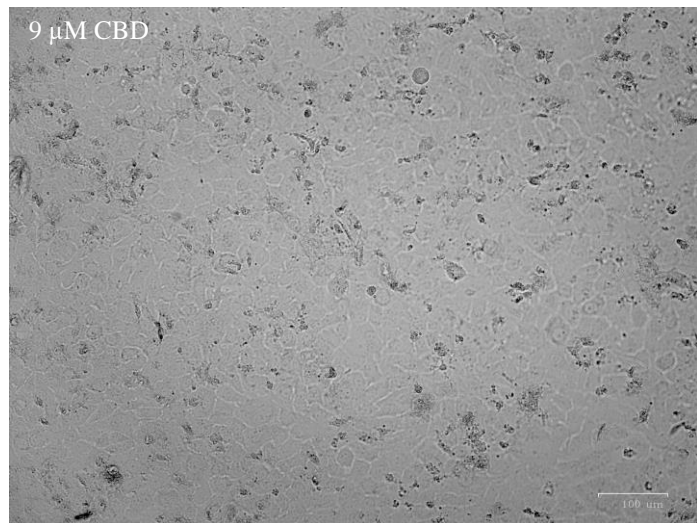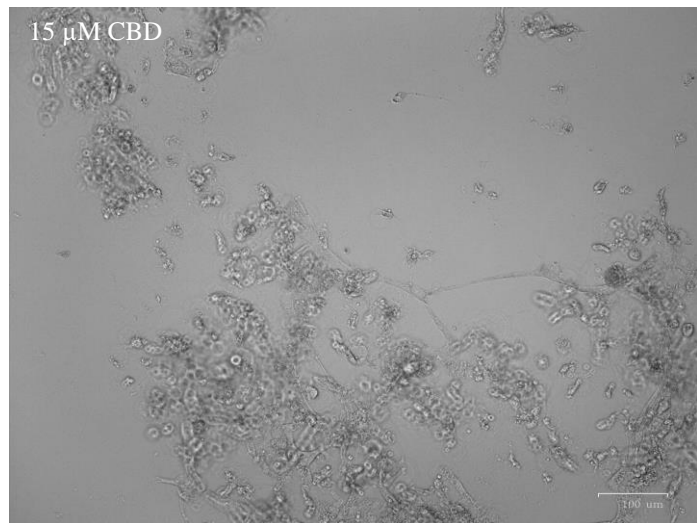

Supplement: s1 [file s1]

**10% FBS**

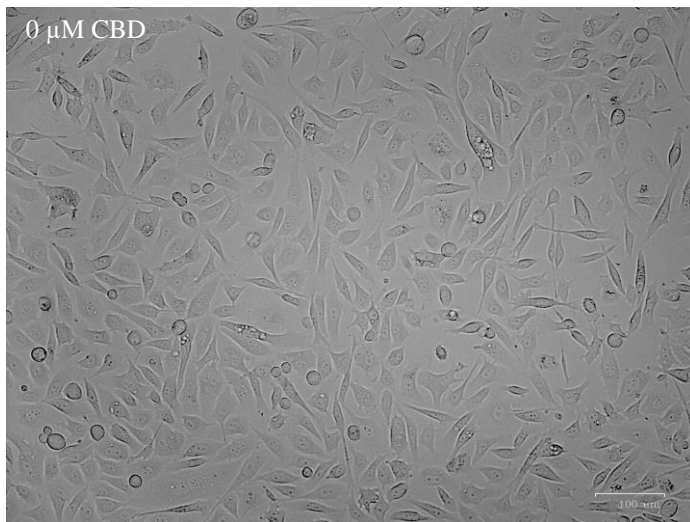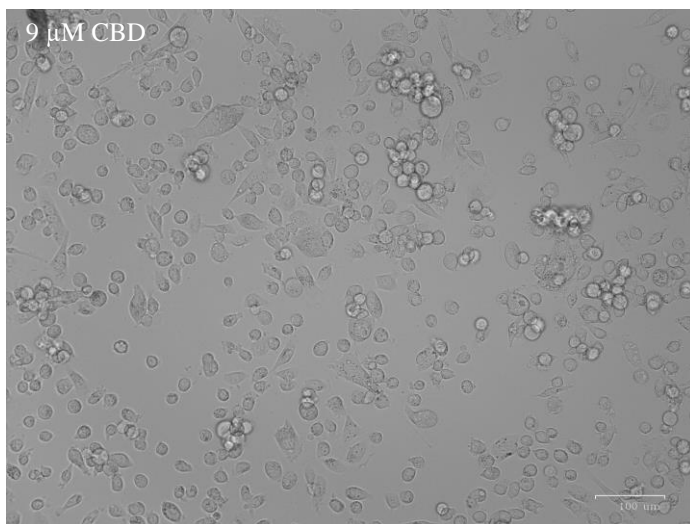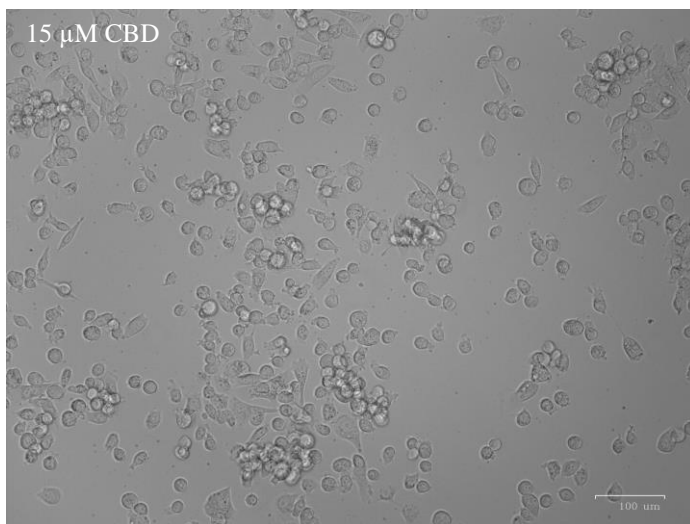

**0.5% FBS**

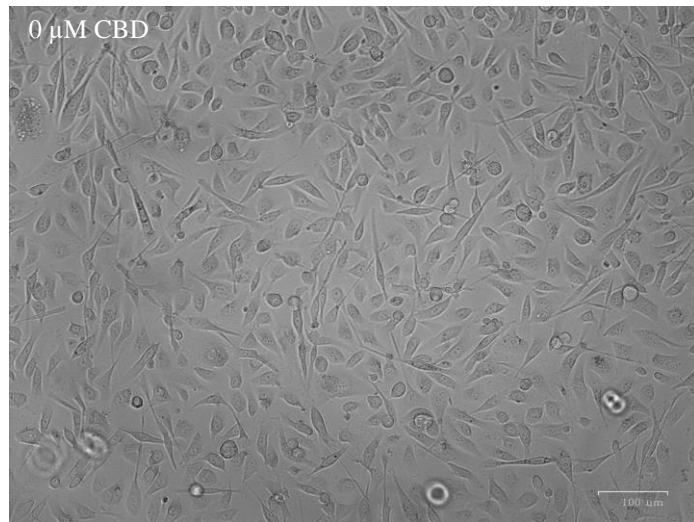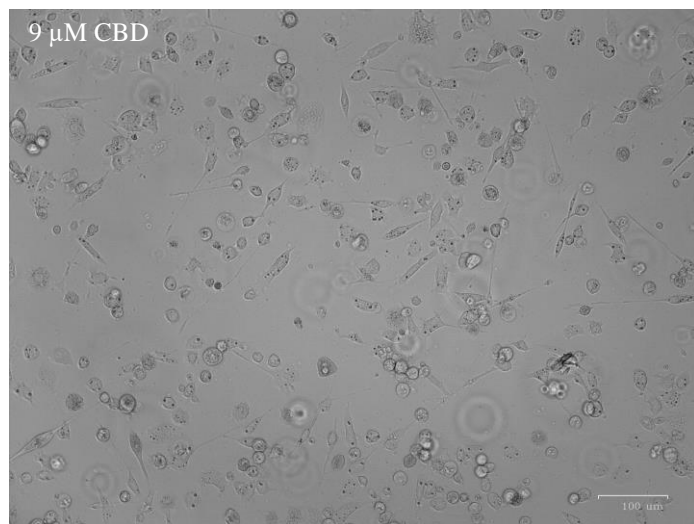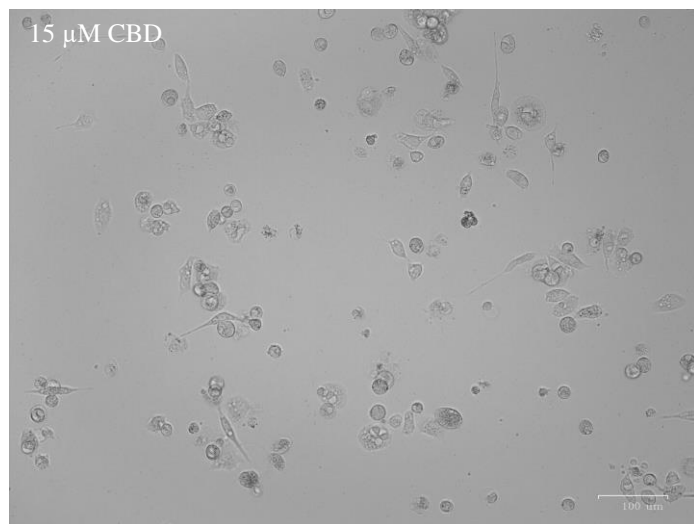

Supplement: s1 [file s1]

**10% FBS**

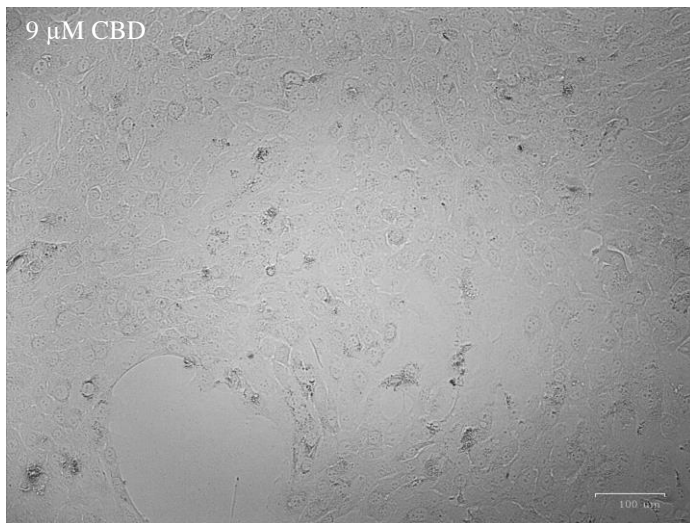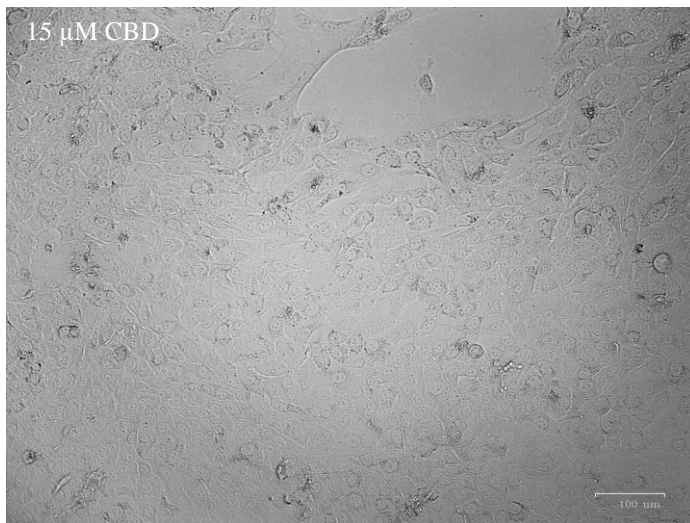

**0.5% FBS**

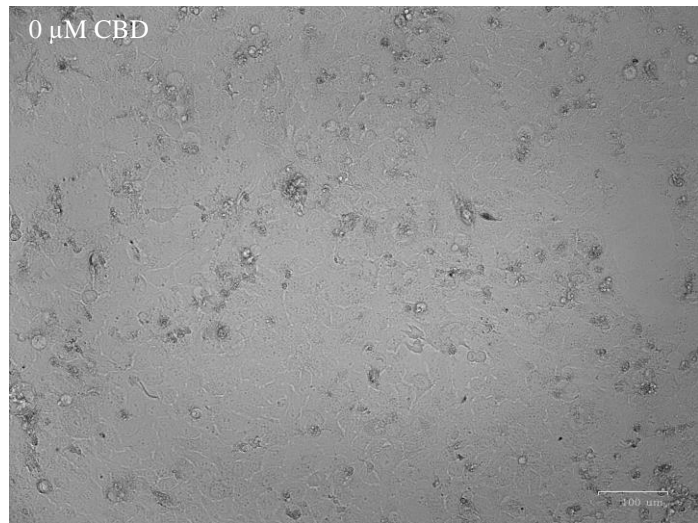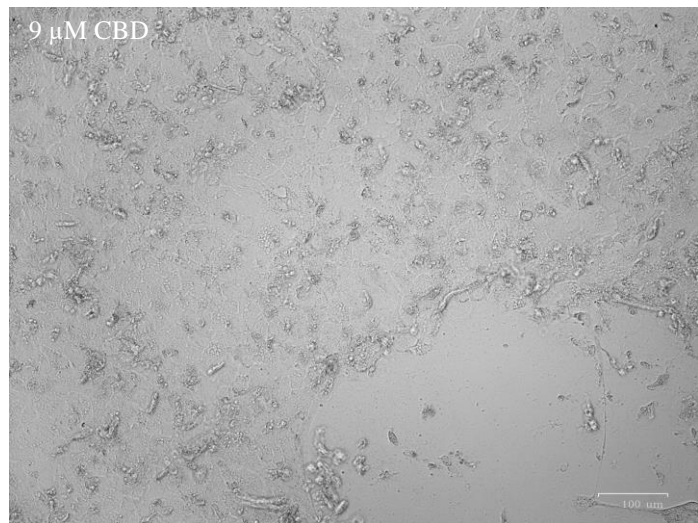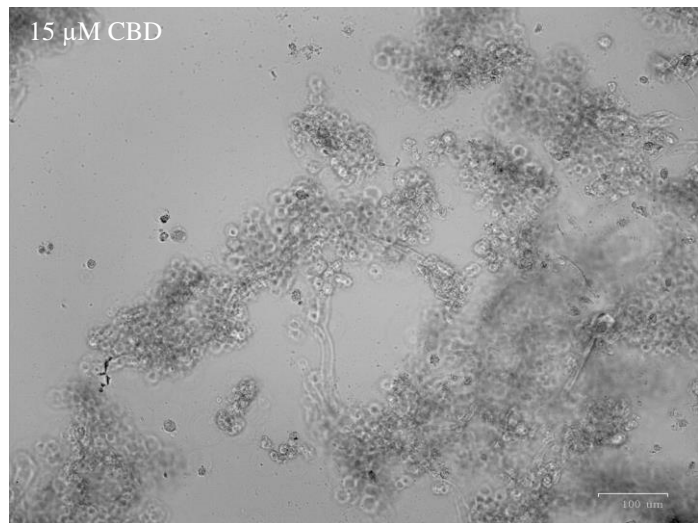

Supplement: s1 [file s1]

## 10% FBS

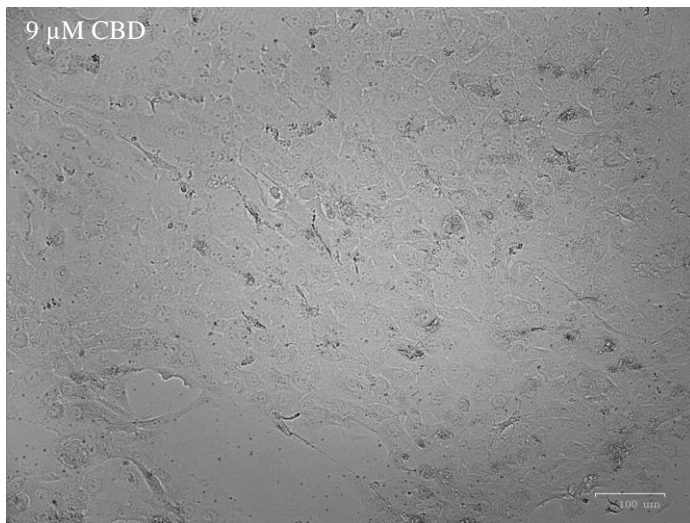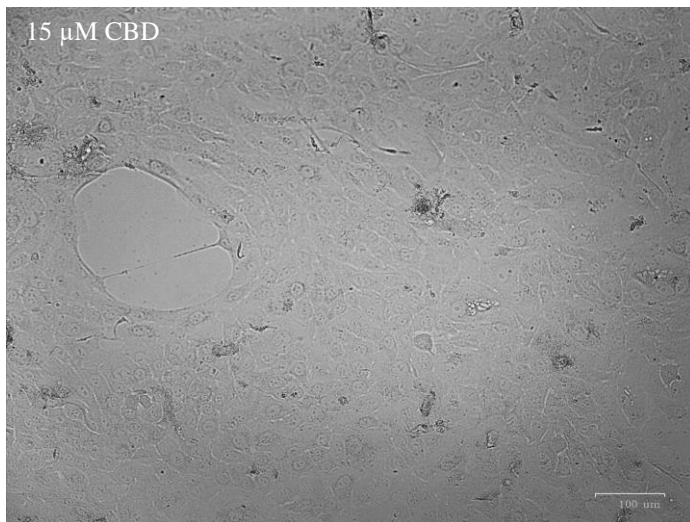

## 0.5% FBS

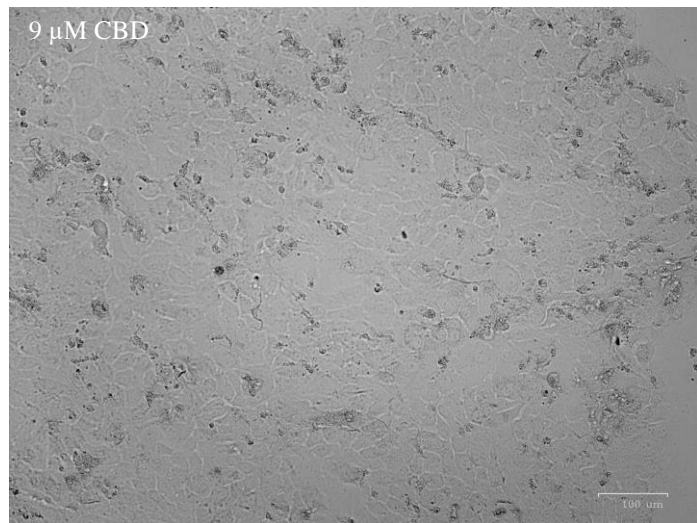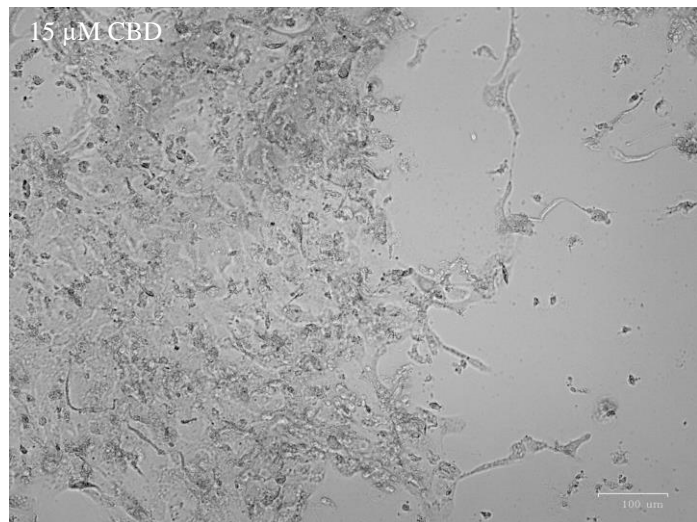

Supplement: s1 [file s1]

**10% FBS**

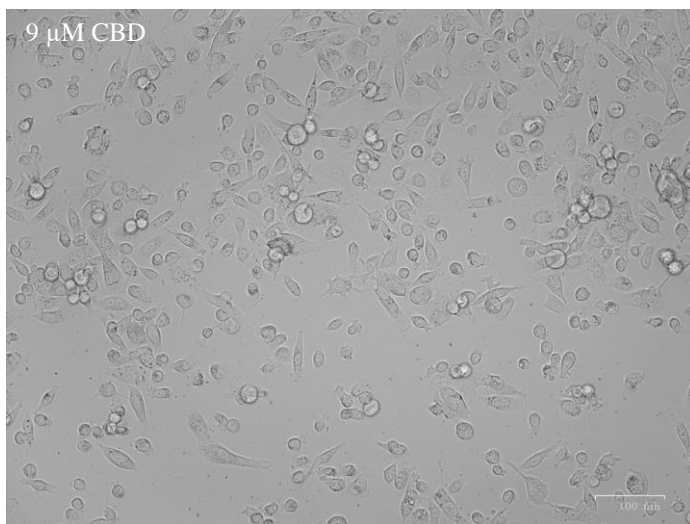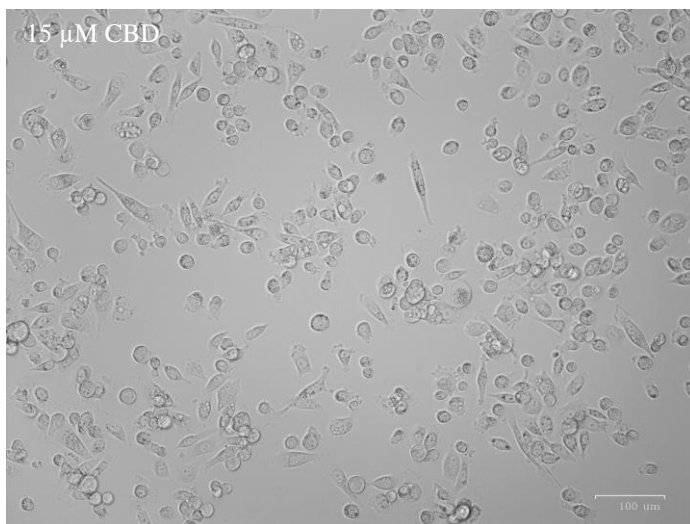

**0.5% FBS**

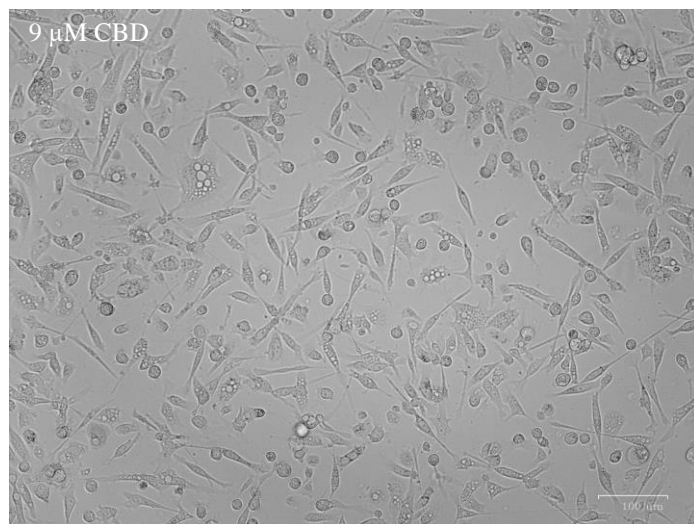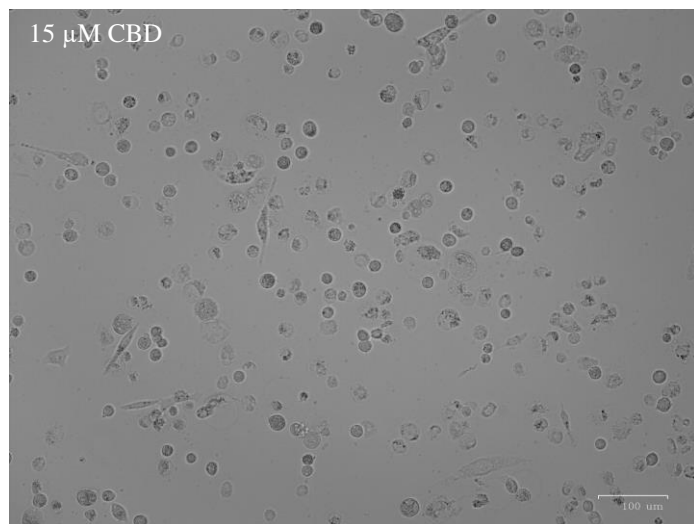

Supplement: s1 [file s1]

**10% FBS**

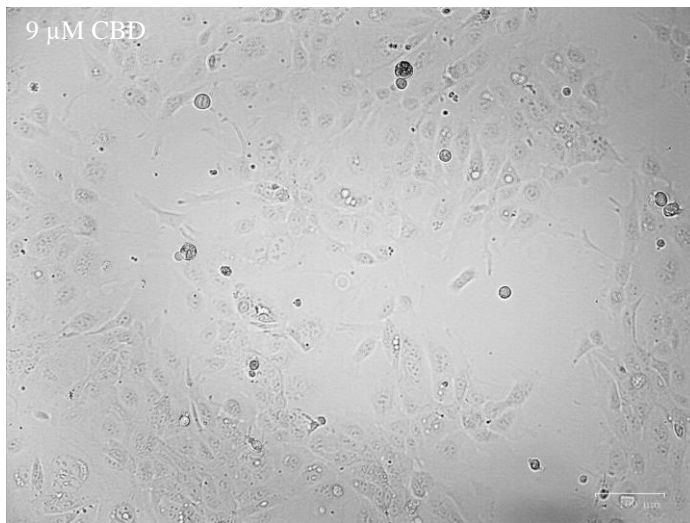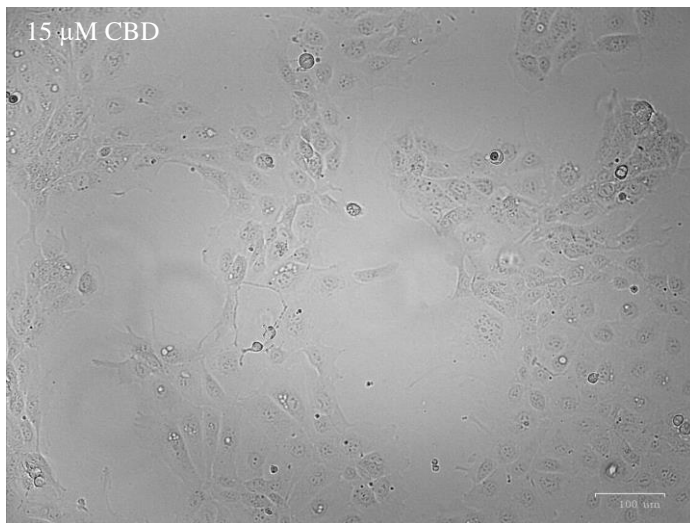

**0.5% FBS**

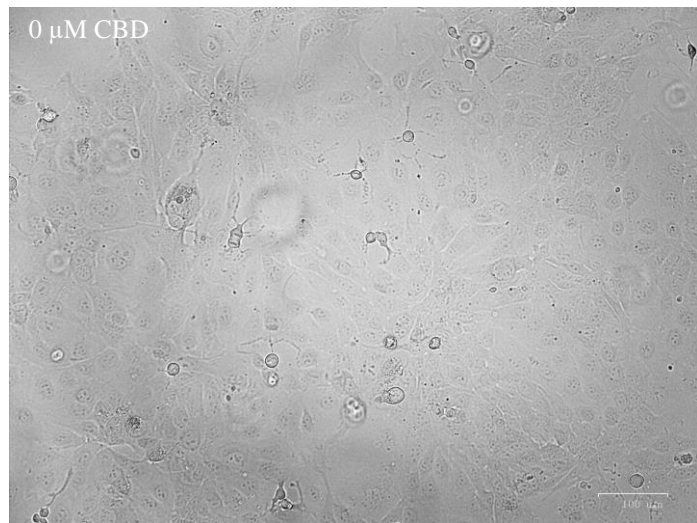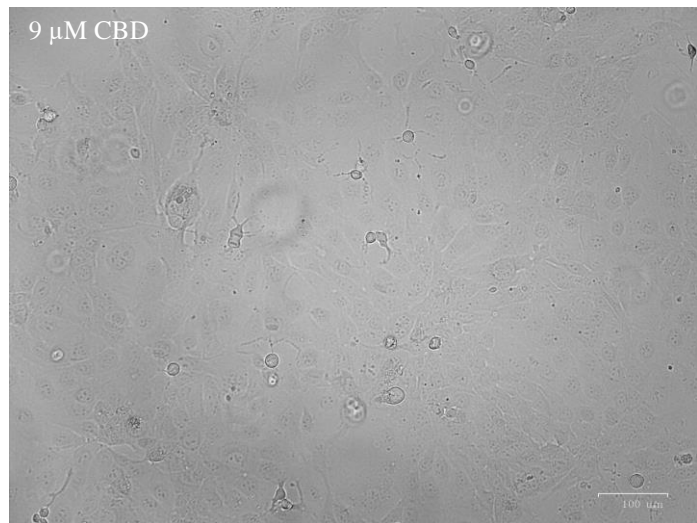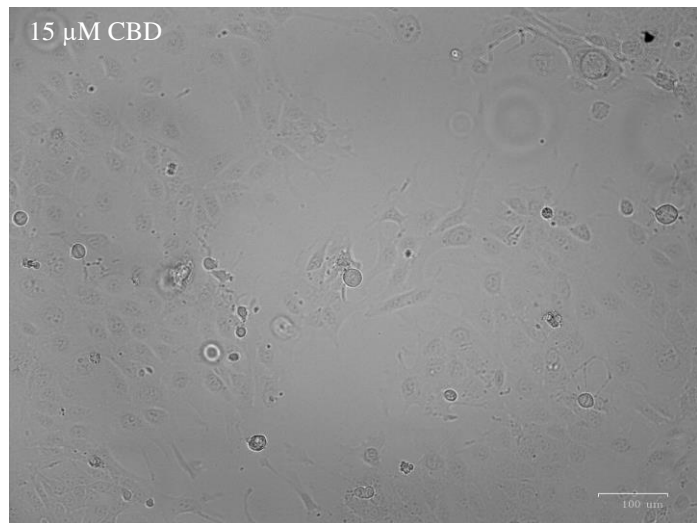

Supplement: s1 [file s1]

## 10% FBS

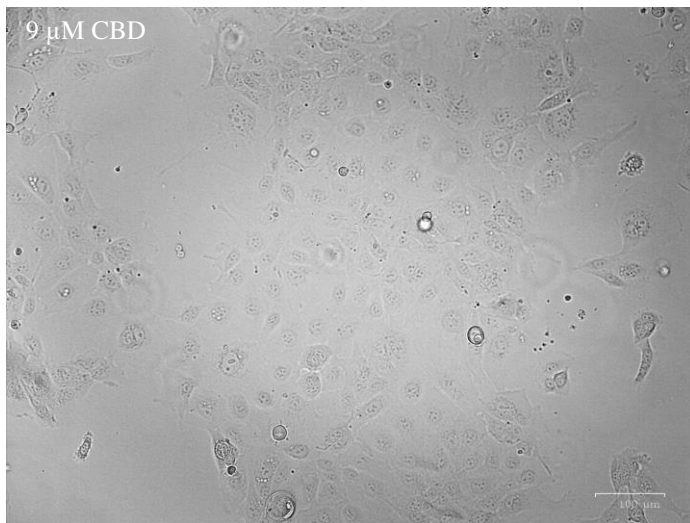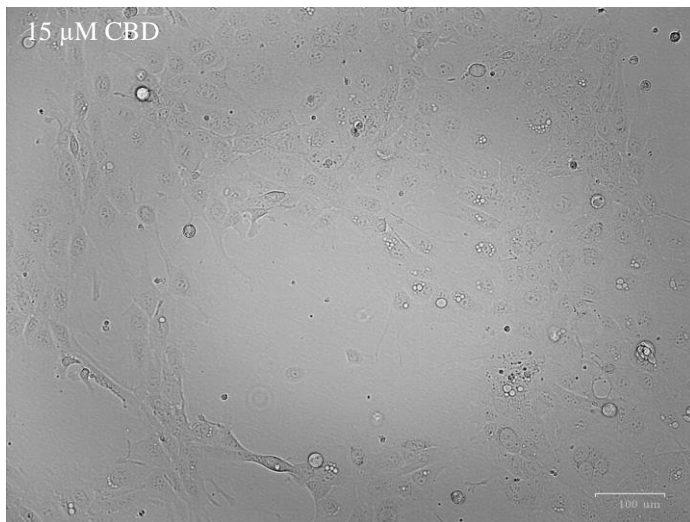

## 0.5% FBS

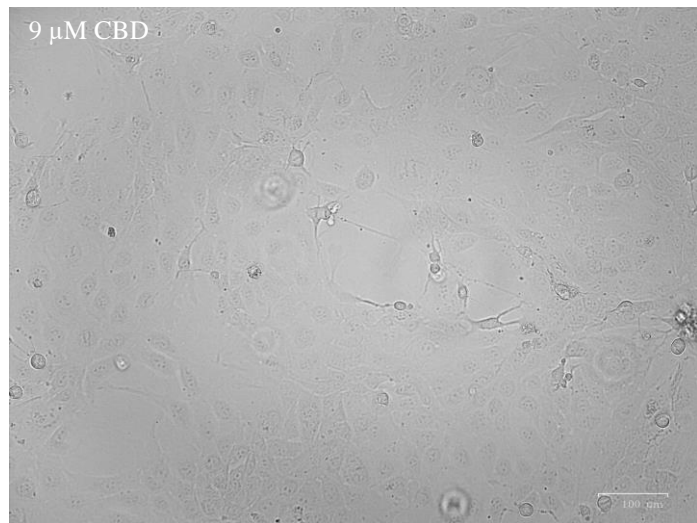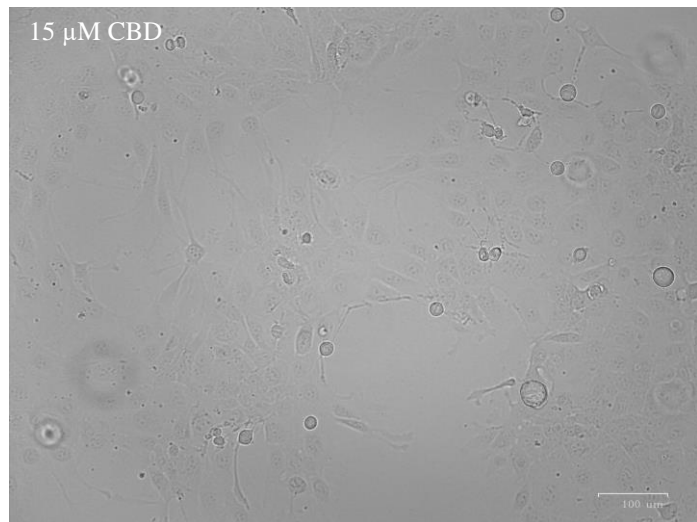

Supplement: s1 [file s1]

**10% FBS**

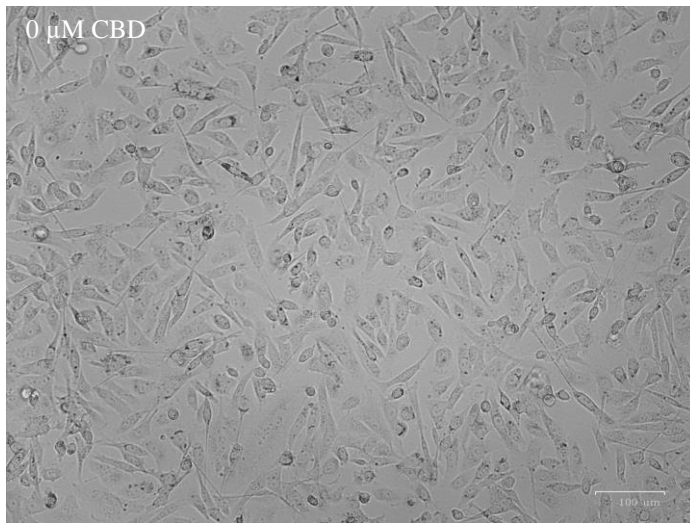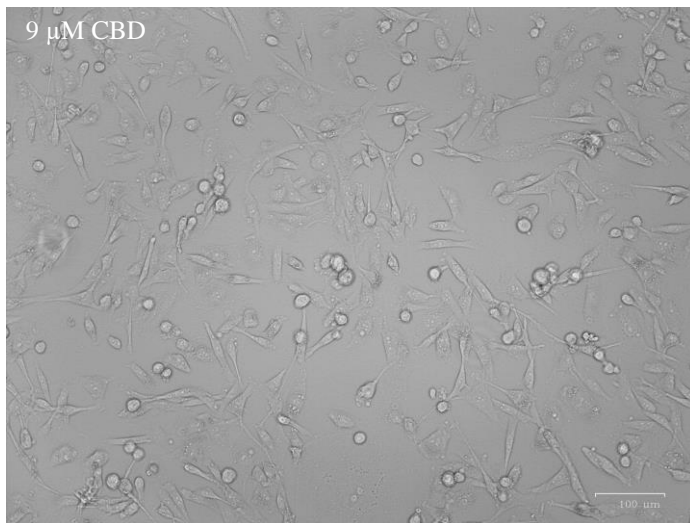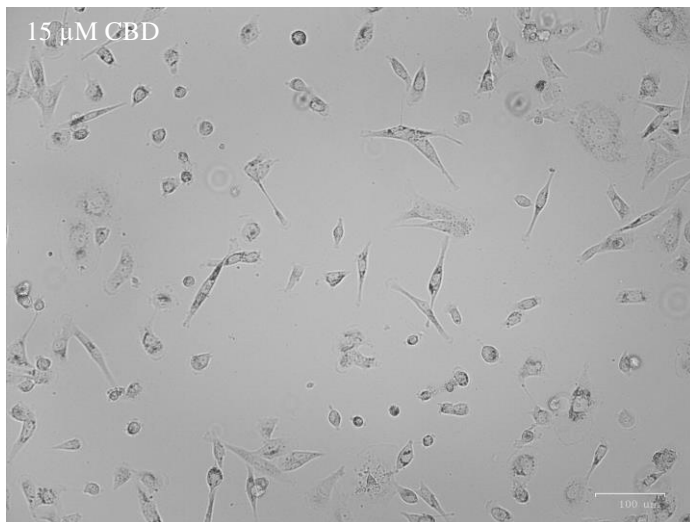

**0.5% FBS**

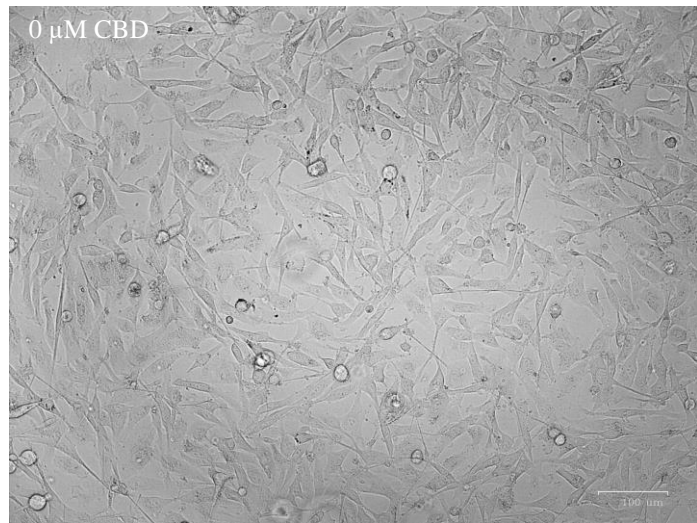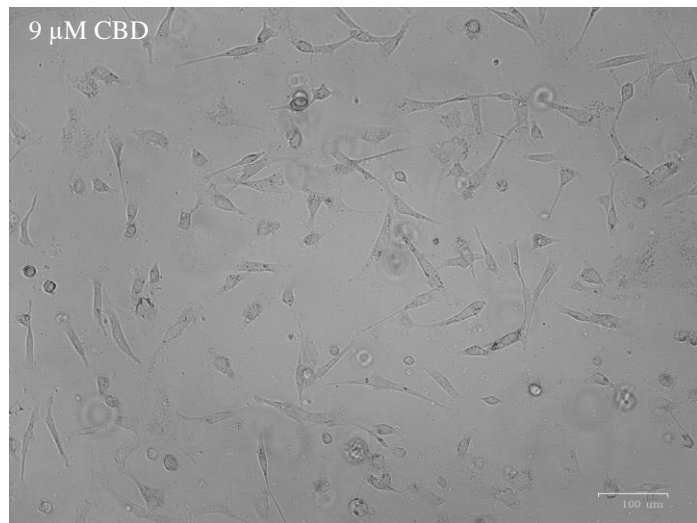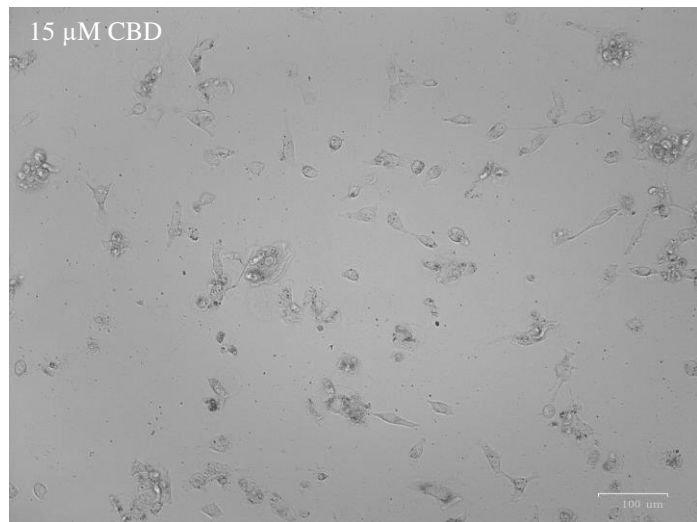

Supplement: s1 [file s1]

**10% FBS**

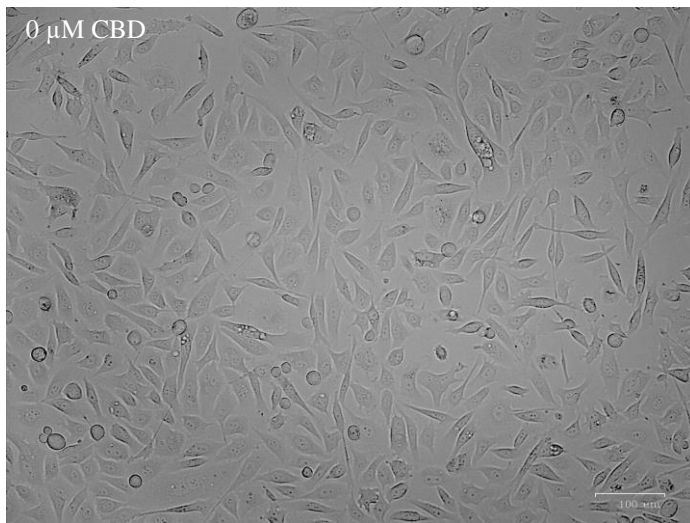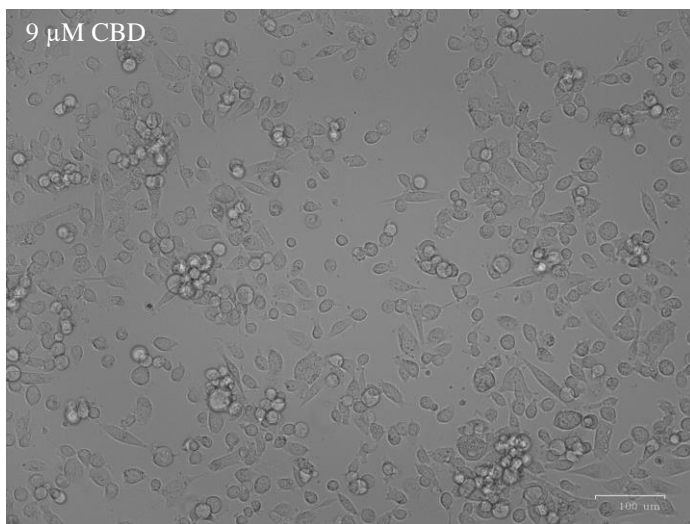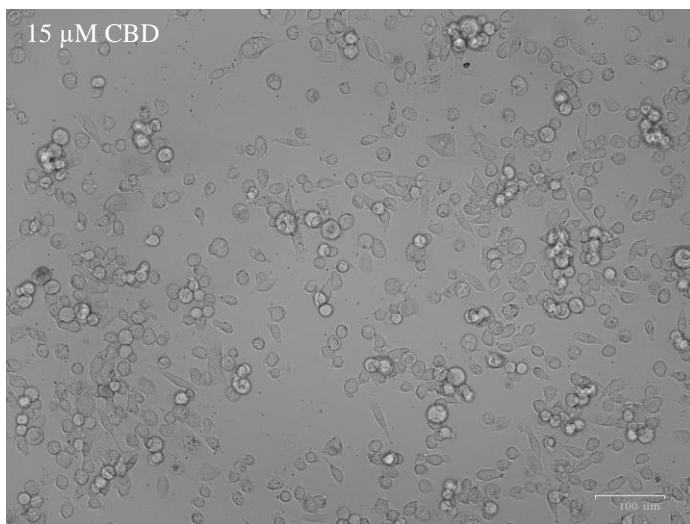

**0.5% FBS**

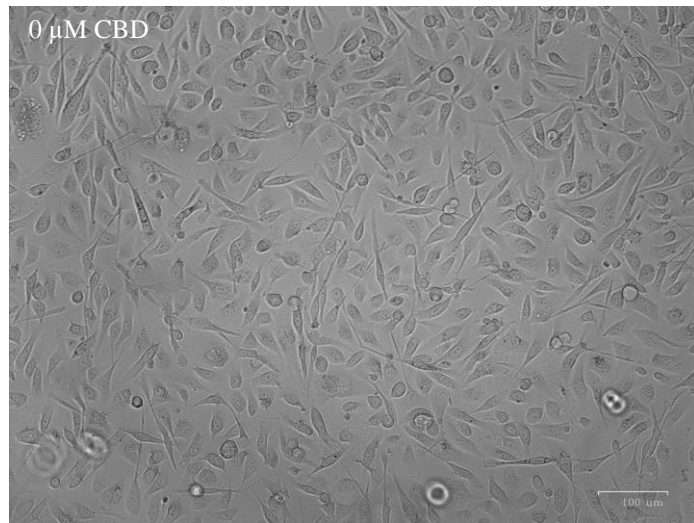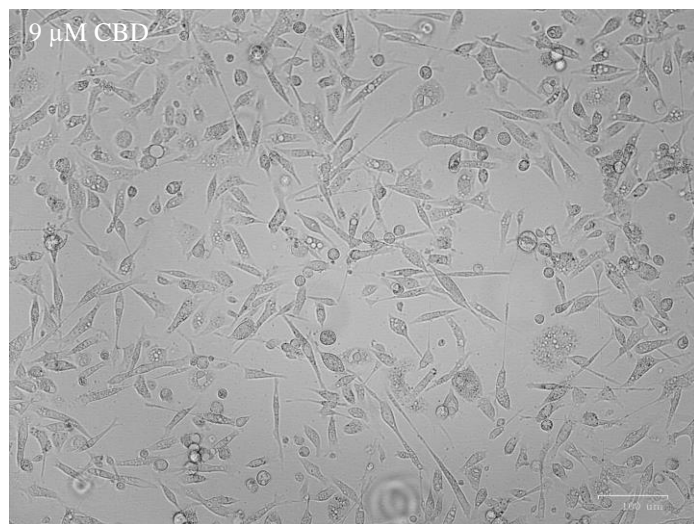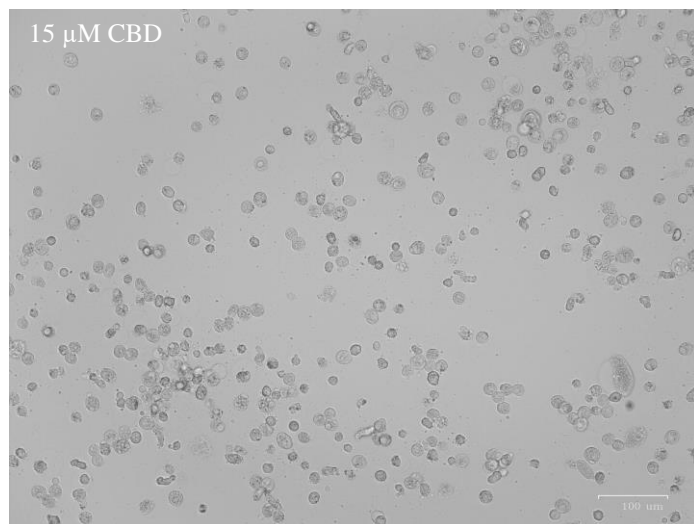

Supplement: s1 [file s1]

**10% FBS**

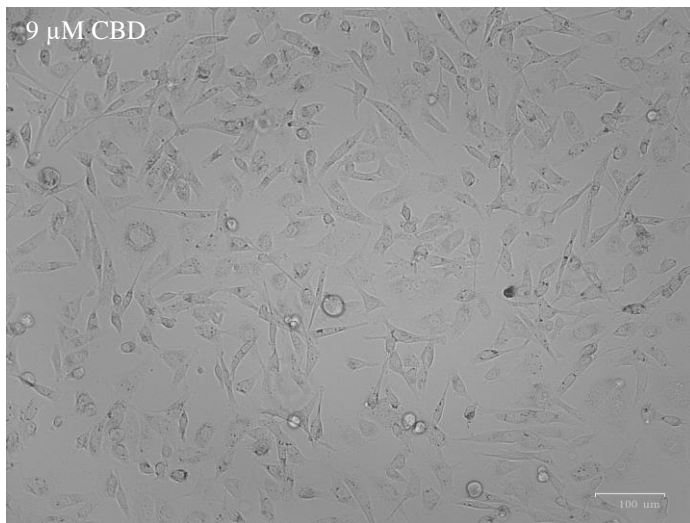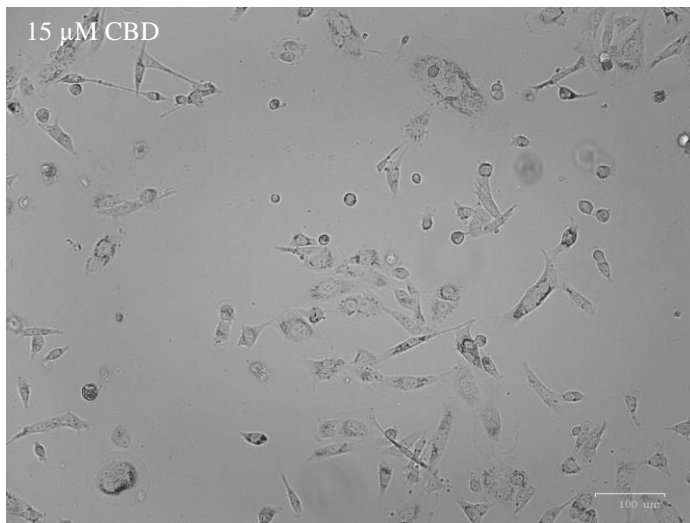

**0.5% FBS**

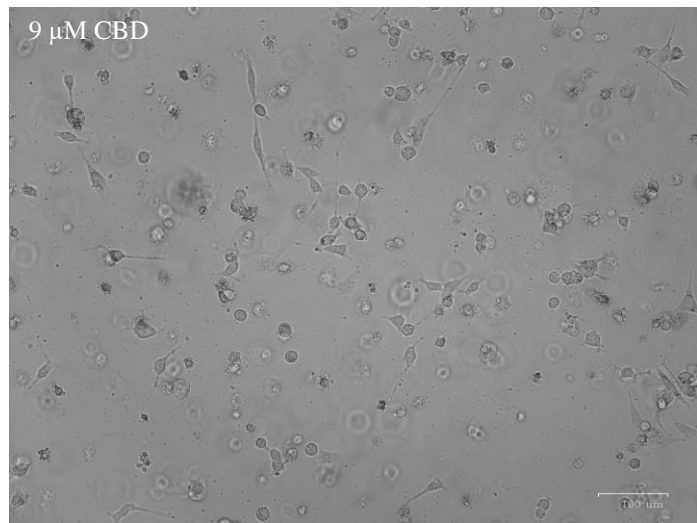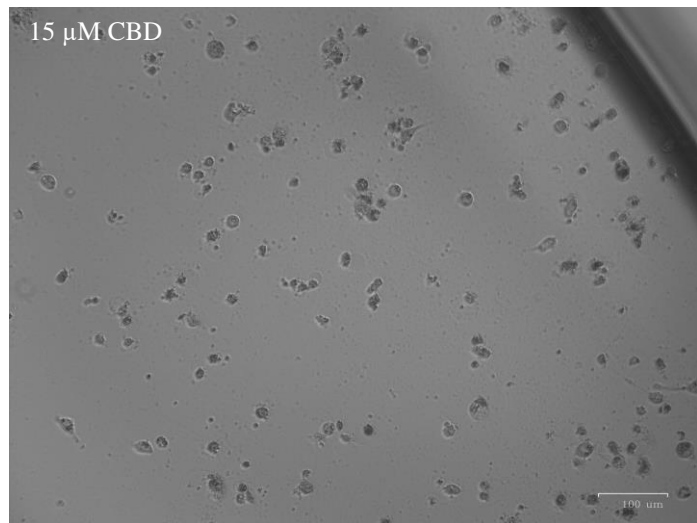

Supplement: s1 [file s1]
